# Supplementary material for: A family of 3D lanthanide oxalatosuccinate with rare structures: 3D host framework incorporating a 3D alkali metal guest lattice
Source: Royal Society of Chemistry journal article supplement (doi:10.1039/b804956d), 2008-11-28
Supplement: b804956d.pdf [file b804956d.pdf]

Supporting Information for

A Family of 3D Lanthanide Oxalatosuccinate with Rare Structures: 3D Host  
Framework Incorporating 3D Alkali Metal Guest Lattice

Ping Zhu, Wen Gu, Mei-Ling Liu, Hai-Bin Song, Xin Liu,<sup>\*</sup> Yue-Qiang Gao,  
Hong-Yue Duan, Shi-Ping Yan, Dai-Zheng Liao

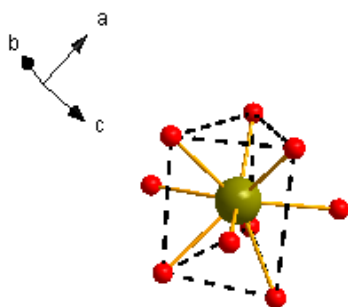

Figure S1: Tricapped trigonal prisms of  $\text{Ln}^{3+}$ .

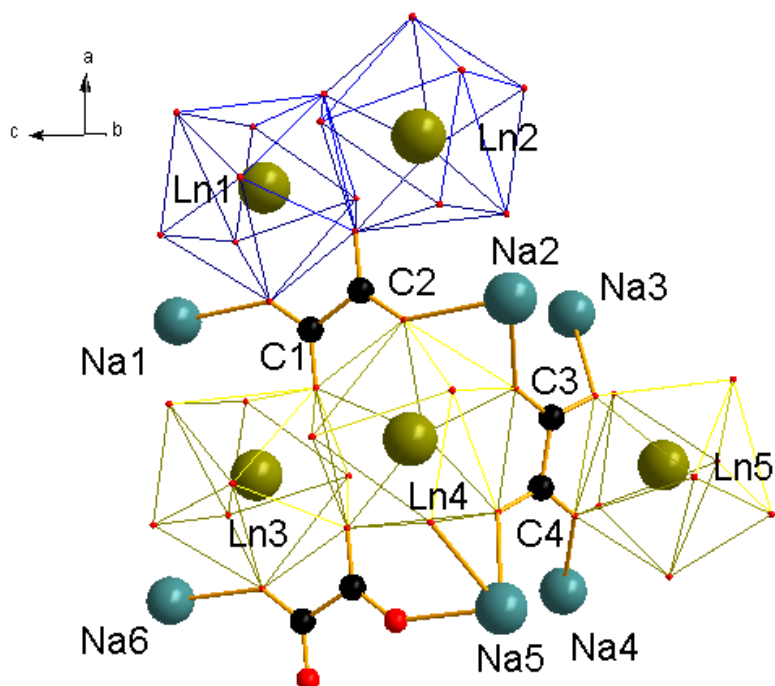

Figure S2: Dual-dual role of ox ligands. Key: polyhedra,  $\text{LnO}_9$ , brown circles, Ln ions; cyan circles, Na ions; black circles, C atoms; red circles, O atoms; H atoms, succinate and waters are omitted for clarity. The  $\text{Na}_1$ - $\text{Na}_2$  distance is 8.331 Å; The  $\text{Na}_2$ - $\text{Na}_3$  distance is 4.753 Å; The  $\text{Na}_2$ - $\text{Na}_5$  distance is 6.275 Å.

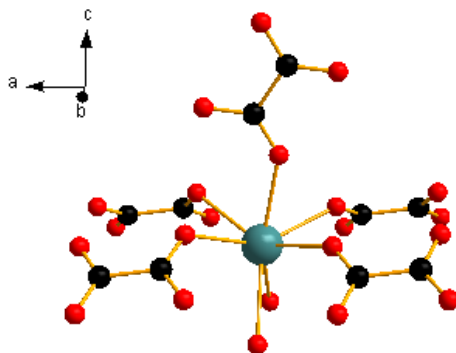

Figure S3: local environment of  $\text{Na}^+$ .

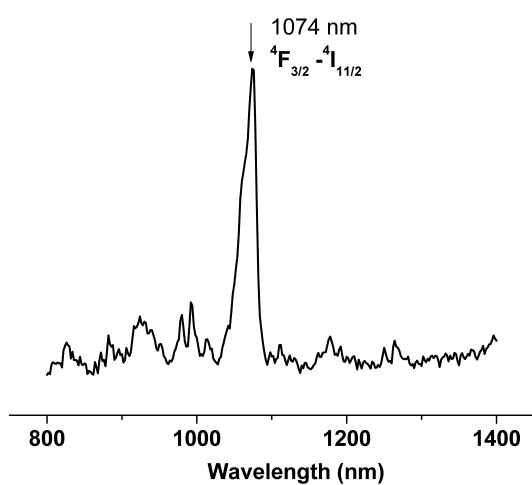

Figure S4: Room-temperature photoluminescence of  $1 \cdot \text{Nd}$  with excitation at 573 nm.

Explanation about problems in CIF files:

1. Restraints had been frequently used in producing CIF files. For example, there are no less than 162 restraints in CIF file of Tb complex. The thermal parameters of ligand atoms were restrain to be approximately isotropic.
2. The structure model of Nd complex is incomplete. 4 H atoms per formula unit are missing. It stems from the H atoms of disordered water were not determined.

Table S1: selected bond lengths (Å) and angles (°) data of complexes **1**.

|                     |            |                     |            |
|---------------------|------------|---------------------|------------|
| Nd(1)-O(2)#1        | 2.459(4)   | O(2)#1-Nd(1)-O(8)   | 75.38(14)  |
| Nd(1)-O(7)#2        | 2.463(4)   | O(7)#2-Nd(1)-O(8)   | 133.78(13) |
| Nd(1)-O(8)          | 2.465(4)   | O(2)#1-Nd(1)-O(5)   | 141.13(13) |
| Nd(1)-O(5)          | 2.466(4)   | O(7)#2-Nd(1)-O(5)   | 76.33(13)  |
| Nd(1)-O(1)          | 2.484(4)   | O(8)-Nd(1)-O(5)     | 77.80(13)  |
| Nd(1)-O(3)          | 2.491(4)   | O(2)#1-Nd(1)-O(1)   | 101.45(16) |
| Nd(1)-O(6)#3        | 2.493(4)   | O(7)#2-Nd(1)-O(1)   | 72.73(15)  |
| Nd(1)-O(4)#1        | 2.499(4)   | O(8)-Nd(1)-O(1)     | 138.75(13) |
| Nd(1)-O(5)#2        | 2.603(4)   | O(5)-Nd(1)-O(1)     | 81.05(14)  |
| Na(1)-O(9)          | 2.201(15)  | O(2)#1-Nd(1)-O(3)   | 70.15(15)  |
| Na(1)-O(3)#4        | 2.369(5)   | O(7)#2-Nd(1)-O(3)   | 73.70(14)  |
| Na(1)-O(1)          | 2.374(5)   | O(8)-Nd(1)-O(3)     | 142.46(13) |
| Na(1)-O(2)#5        | 2.418(5)   | O(5)-Nd(1)-O(3)     | 139.57(13) |
| Na(1)-O(6)          | 2.466(5)   | O(1)-Nd(1)-O(3)     | 64.57(13)  |
| Na(1)-O(4)#1        | 2.502(5)   | O(2)#1-Nd(1)-O(6)#3 | 67.08(13)  |
| O(2)#1-Nd(1)-O(7)#2 | 141.91(14) | O(7)#2-Nd(1)-O(6)#3 | 88.41(13)  |
| O(1)-Nd(1)-O(4)#1   | 69.07(14)  | O(8)-Nd(1)-O(6)#3   | 85.93(13)  |
| O(3)-Nd(1)-O(4)#1   | 104.61(14) | O(5)-Nd(1)-O(6)#3   | 138.00(13) |
| O(6)#3-Nd(1)-O(4)#1 | 131.01(12) | O(1)-Nd(1)-O(6)#3   | 131.59(13) |
| O(2)#1-Nd(1)-O(5)#2 | 119.48(14) | O(3)-Nd(1)-O(6)#3   | 67.44(12)  |
| O(7)#2-Nd(1)-O(5)#2 | 67.44(12)  | O(2)#1-Nd(1)-O(4)#1 | 65.05(13)  |
| O(8)-Nd(1)-O(5)#2   | 69.21(12)  | O(7)#2-Nd(1)-O(4)#1 | 137.70(13) |
| O(5)-Nd(1)-O(5)#2   | 75.00(14)  | O(4)#1-Nd(1)-O(5)#2 | 138.07(12) |
| O(1)-Nd(1)-O(5)#2   | 137.18(14) | O(8)-Nd(1)-O(4)#1   | 72.74(14)  |
| O(3)-Nd(1)-O(5)#2   | 116.18(13) | O(5)-Nd(1)-O(4)#1   | 80.44(13)  |
| O(6)#3-Nd(1)-O(5)#2 | 63.02(12)  |                     |            |

Symmetry transformations used to generate equivalent atoms:

#1 -x+1,y-1/2,-z+1/2 #2 -x+1,-y+2,-z #3 x-1,y,z #4 -x+1,-y,-z+1 #5 -x+1,y-1/2,-z+1/2

Table S2: selected bond lengths (Å) and angles (°) data of complexes **2**.

|                     |            |                     |            |
|---------------------|------------|---------------------|------------|
| Eu(1)-O(7)#1        | 2.409(3)   | O(7)#1-Eu(1)-O(3)   | 73.38(10)  |
| Eu(1)-O(8)          | 2.419(3)   | O(8)-Eu(1)-O(3)     | 143.23(10) |
| Eu(1)-O(2)#2        | 2.430(3)   | O(2)#2-Eu(1)-O(3)   | 69.98(11)  |
| Eu(1)-O(5)          | 2.435(3)   | O(5)-Eu(1)-O(3)     | 138.48(10) |
| Eu(1)-O(1)          | 2.455(3)   | O(1)-Eu(1)-O(3)     | 65.18(10)  |
| Eu(1)-O(4)#2        | 2.459(3)   | O(4)#2-Eu(1)-O(3)   | 104.45(11) |
| Eu(1)-O(6)#3        | 2.459(3)   | O(6)#3-Eu(1)-O(3)   | 67.15(10)  |
| Eu(1)-O(3)          | 2.470(3)   | O(7)#1-Eu(1)-O(5)#1 | 67.66(10)  |
| Eu(1)-O(5)#1        | 2.577(3)   | O(8)-Eu(1)-O(5)#1   | 69.58(10)  |
| Na(1)-O(9)          | 2.323(5)   | O(2)#2-Eu(1)-O(5)#1 | 119.44(10) |
| Na(1)-O(3)#4        | 2.355(3)   | O(5)-Eu(1)-O(5)#1   | 75.21(10)  |
| Na(1)-O(1)          | 2.389(4)   | O(1)-Eu(1)-O(5)#1   | 136.16(10) |
| Na(1)-O(2)#5        | 2.435(4)   | O(4)#2-Eu(1)-O(5)#1 | 137.78(10) |
| Na(1)-O(6)          | 2.491(3)   | O(6)#3-Eu(1)-O(5)#1 | 63.51(9)   |
| Na(1)-O(4)#2        | 2.500(4)   | O(3)-Eu(1)-O(5)#1   | 116.76(10) |
| Na(1)-O(10)         | 2.793(7)   | O(7)#1-Eu(1)-C(1)#2 | 156.30(10) |
| O(7)#1-Eu(1)-O(8)   | 134.24(10) | O(8)-Eu(1)-C(1)#2   | 67.91(11)  |
| O(7)#1-Eu(1)-O(2)#2 | 141.26(11) | O(2)#2-Eu(1)-C(1)#2 | 19.28(10)  |
| O(8)-Eu(1)-O(2)#2   | 75.79(11)  | O(5)-Eu(1)-C(1)#2   | 123.07(10) |
| O(7)#1-Eu(1)-O(5)   | 76.15(10)  | O(1)-Eu(1)-C(1)#2   | 96.55(11)  |
| O(8)-Eu(1)-O(5)     | 77.99(10)  | O(4)#2-Eu(1)-C(1)#2 | 47.03(10)  |
| O(2)#2-Eu(1)-O(5)   | 141.86(10) | O(6)#3-Eu(1)-C(1)#2 | 84.87(10)  |
| O(7)#1-Eu(1)-O(1)   | 72.09(11)  | O(3)-Eu(1)-C(1)#2   | 82.99(11)  |
| O(8)-Eu(1)-O(1)     | 137.56(10) | O(5)#1-Eu(1)-C(1)#2 | 127.24(10) |
| O(2)#2-Eu(1)-O(1)   | 102.71(11) | O(7)#1-Eu(1)-C(2)#2 | 154.03(11) |
| O(5)-Eu(1)-O(1)     | 79.06(10)  | O(8)-Eu(1)-C(2)#2   | 66.32(10)  |
| O(7)#1-Eu(1)-O(4)#2 | 137.56(11) | O(2)#2-Eu(1)-C(2)#2 | 46.32(10)  |
| O(8)-Eu(1)-O(4)#2   | 72.09(11)  | O(5)-Eu(1)-C(2)#2   | 97.54(10)  |
| O(2)#2-Eu(1)-O(4)#2 | 65.68(10)  | O(1)-Eu(1)-C(2)#2   | 82.01(11)  |
| O(5)-Eu(1)-O(4)#2   | 80.19(10)  | O(4)#2-Eu(1)-C(2)#2 | 19.93(10)  |
| O(1)-Eu(1)-O(4)#2   | 69.14(11)  | O(6)#3-Eu(1)-C(2)#2 | 111.77(10) |
| O(7)#1-Eu(1)-O(6)#3 | 87.61(11)  | O(3)-Eu(1)-C(2)#2   | 97.66(10)  |
| O(8)-Eu(1)-O(6)#3   | 87.61(11)  | O(5)#1-Eu(1)-C(2)#2 | 135.84(10) |
| O(2)#2-Eu(1)-O(6)#3 | 67.02(10)  | C(1)#2-Eu(1)-C(2)#2 | 27.30(10)  |
| O(5)-Eu(1)-O(6)#3   | 138.72(10) | O(4)#2-Eu(1)-O(6)#3 | 131.71(10) |
| O(1)-Eu(1)-O(6)#3   | 131.72(10) |                     |            |

Symmetry transformations used to generate equivalent atoms:

#1 -x+1,-y+2,-z #2 -x+1,y-1/2,-z+1/2 #3 x-1,y,z #4 x+1,y,z #5 -x+2,y-1/2,-z+1/2

Table S3: selected bond lengths (Å) and angles (°) data of complexes **3**.

|                     |            |                     |            |
|---------------------|------------|---------------------|------------|
| Gd(1)-O(7)#1        | 2.392(5)   | O(5)-Gd(1)-O(4)#2   | 80.03(16)  |
| Gd(1)-O(8)          | 2.400(5)   | O(6)#3-Gd(1)-O(4)#2 | 131.82(16) |
| Gd(1)-O(2)#2        | 2.414(5)   | O(1)-Gd(1)-O(4)#2   | 69.29(18)  |
| Gd(1)-O(5)          | 2.415(5)   | O(7)#1-Gd(1)-O(3)   | 73.20(17)  |
| Gd(1)-O(6)#3        | 2.430(5)   | O(8)-Gd(1)-O(3)     | 143.20(16) |
| Gd(1)-O(1)          | 2.438(5)   | O(2)#2-Gd(1)-O(3)   | 70.00(18)  |
| Gd(1)-O(4)#2        | 2.441(5)   | O(5)-Gd(1)-O(3)     | 138.45(16) |
| Gd(1)-O(3)          | 2.453(5)   | O(6)#3-Gd(1)-O(3)   | 67.06(16)  |
| Gd(1)-O(5)#1        | 2.566(5)   | O(1)-Gd(1)-O(3)     | 65.50(16)  |
| Na(1)-O(10)         | 2.302(7)   | O(4)#2-Gd(1)-O(3)   | 104.68(18) |
| Na(1)-O(9)          | 2.307(8)   | O(7)#1-Gd(1)-O(5)#1 | 67.79(16)  |
| Na(1)-O(3)#4        | 2.340(5)   | O(8)-Gd(1)-O(5)#1   | 69.52(16)  |
| Na(1)-O(1)          | 2.376(6)   | O(2)#2-Gd(1)-O(5)#1 | 119.32(16) |
| Na(1)-O(2)#5        | 2.419(6)   | O(5)-Gd(1)-O(5)#1   | 75.15(16)  |
| Na(1)-O(6)          | 2.480(6)   | O(6)#3-Gd(1)-O(5)#1 | 63.62(15)  |
| Na(1)-O(4)#2        | 2.485(6)   | O(1)-Gd(1)-O(5)#1   | 135.70(17) |
| O(7)#1-Gd(1)-O(8)   | 134.35(17) | O(4)#2-Gd(1)-O(5)#1 | 137.67(17) |
| O(7)#1-Gd(1)-O(2)#2 | 141.11(17) | O(3)-Gd(1)-O(5)#1   | 116.69(16) |
| O(8)-Gd(1)-O(2)#2   | 75.75(18)  | O(8)-Gd(1)-O(1)     | 137.66(17) |
| O(7)#1-Gd(1)-O(5)   | 76.16(17)  | O(2)#2-Gd(1)-O(1)   | 103.30(19) |
| O(8)-Gd(1)-O(5)     | 78.07(16)  | O(5)-Gd(1)-O(1)     | 78.67(16)  |
| O(2)#2-Gd(1)-O(5)   | 142.02(16) | O(6)#3-Gd(1)-O(1)   | 131.90(16) |
| O(7)#1-Gd(1)-O(6)#3 | 87.73(17)  | O(7)#1-Gd(1)-O(4)#2 | 137.33(17) |
| O(8)-Gd(1)-O(6)#3   | 87.52(17)  | O(8)-Gd(1)-O(4)#2   | 72.17(18)  |
| O(2)#2-Gd(1)-O(6)#3 | 66.77(16)  | O(2)#2-Gd(1)-O(4)#2 | 66.04(16)  |
| O(5)-Gd(1)-O(6)#3   | 138.76(16) | O(7)#1-Gd(1)-O(1)   | 71.63(18)  |

Symmetry transformations used to generate equivalent atoms:

#1 -x+1,-y+2,-z    #2 -x+1,y-1/2,-z+1/2    #3 x-1,y,z    #4 x+1,y,z    #5 -x+2,y-1/2,-z+1/2

Table S4: selected bond lengths (Å) and angles (°) data of complexes **4**.

|                     |          |                     |          |
|---------------------|----------|---------------------|----------|
| Tb(1)-O(7)#1        | 2.358(7) | O(8)-Tb(1)-O(6)#3   | 87.1(2)  |
| Tb(1)-O(8)          | 2.393(7) | O(2)#2-Tb(1)-O(6)#3 | 66.7(2)  |
| Tb(1)-O(2)#2        | 2.391(6) | O(5)-Tb(1)-O(6)#3   | 139.0(2) |
| Tb(1)-O(5)          | 2.393(6) | O(1)-Tb(1)-O(6)#3   | 132.4(2) |
| Tb(1)-O(1)          | 2.414(7) | O(4)#2-Tb(1)-O(6)#3 | 131.7(2) |
| Tb(1)-O(4)#2        | 2.425(7) | O(7)#1-Tb(1)-O(3)   | 72.9(2)  |
| Tb(1)-O(6)#3        | 2.422(7) | O(8)-Tb(1)-O(3)     | 143.4(2) |
| Tb(1)-O(3)          | 2.441(6) | O(2)#2-Tb(1)-O(3)   | 70.1(2)  |
| Tb(1)-O(5)#1        | 2.567(6) | O(5)-Tb(1)-O(3)     | 138.5(2) |
| O(7)#1-Tb(1)-O(8)   | 134.6(2) | O(1)-Tb(1)-O(3)     | 65.5(2)  |
| O(7)#1-Tb(1)-O(2)#2 | 141.2(2) | O(4)#2-Tb(1)-O(3)   | 105.2(2) |
| O(8)-Tb(1)-O(2)#2   | 75.9(2)  | O(6)#3-Tb(1)-O(3)   | 67.5(2)  |
| O(7)#1-Tb(1)-O(5)   | 76.5(2)  | O(7)#1-Tb(1)-O(5)#1 | 67.5(2)  |
| O(8)-Tb(1)-O(5)     | 77.8(2)  | O(8)-Tb(1)-O(5)#1   | 69.9(2)  |
| O(2)#2-Tb(1)-O(5)   | 141.5(2) | O(2)#2-Tb(1)-O(5)#1 | 120.2(2) |
| O(7)#1-Tb(1)-O(1)   | 71.4(3)  | O(5)-Tb(1)-O(5)#1   | 75.0(2)  |
| O(8)-Tb(1)-O(1)     | 137.5(2) | O(1)-Tb(1)-O(5)#1   | 135.1(2) |
| O(2)#2-Tb(1)-O(1)   | 103.0(3) | O(4)#2-Tb(1)-O(5)#1 | 137.5(2) |
| O(5)-Tb(1)-O(1)     | 78.6(2)  | O(6)#3-Tb(1)-O(5)#1 | 64.0(2)  |
| O(7)#1-Tb(1)-O(4)#2 | 137.0(2) | O(3)-Tb(1)-O(5)#1   | 116.6(2) |
| O(8)-Tb(1)-O(4)#2   | 71.9(2)  | O(1)-Tb(1)-O(4)#2   | 69.3(3)  |
| O(2)#2-Tb(1)-O(4)#2 | 66.1(2)  | O(7)#1-Tb(1)-O(6)#3 | 88.4(2)  |
| O(5)-Tb(1)-O(4)#2   | 79.3(2)  |                     |          |

Symmetry transformations used to generate equivalent atoms:

#1 -x+1,-y+2,-z      #2 -x+1,y-1/2,-z+1/2      #3 x-1,y,z

Table S5: selected bond lengths (Å) and angles (°) data of complexes **5**.

|                     |            |                     |            |
|---------------------|------------|---------------------|------------|
| Nd(1)-O(2)#1        | 2.402(3)   | O(2)#3-Nd(1)-O(2)   | 172.32(11) |
| Nd(1)-O(2)#2        | 2.402(3)   | O(2)#1-Nd(1)-C(1)#3 | 84.45(11)  |
| Nd(1)-O(3)          | 2.473(3)   | O(2)#2-Nd(1)-C(1)#3 | 102.22(11) |
| Nd(1)-O(3)#3        | 2.473(3)   | O(3)-Nd(1)-C(1)#3   | 72.89(10)  |
| Nd(1)-O(4)          | 2.507(3)   | O(3)#3-Nd(1)-C(1)#3 | 88.12(10)  |
| Nd(1)-O(4)#3        | 2.507(3)   | O(4)-Nd(1)-C(1)#3   | 136.05(10) |
| Nd(1)-O(1)#3        | 2.525(3)   | O(4)#3-Nd(1)-C(1)#3 | 66.12(11)  |
| Nd(1)-O(1)          | 2.525(3)   | O(1)#3-Nd(1)-C(1)#3 | 22.81(10)  |
| O(2)#1-Nd(1)-O(2)#2 | 145.56(14) | O(1)-Nd(1)-C(1)#3   | 142.60(11) |
| O(2)#1-Nd(1)-O(3)   | 74.78(9)   | O(2)#3-Nd(1)-C(1)#3 | 23.81(9)   |
| O(2)#2-Nd(1)-O(3)   | 139.61(9)  | O(2)-Nd(1)-C(1)#3   | 152.74(9)  |
| O(2)#1-Nd(1)-O(3)#3 | 139.61(9)  | O(2)#1-Nd(1)-C(1)   | 102.22(11) |
| O(2)#2-Nd(1)-O(3)#3 | 74.78(9)   | O(2)#2-Nd(1)-C(1)   | 84.45(11)  |
| O(3)-Nd(1)-O(3)#3   | 65.11(12)  | O(3)-Nd(1)-C(1)     | 88.11(10)  |
| O(2)#1-Nd(1)-O(4)   | 75.27(10)  | O(3)#3-Nd(1)-C(1)   | 72.89(10)  |
| O(2)#2-Nd(1)-O(4)   | 76.91(10)  | O(4)-Nd(1)-C(1)     | 66.12(11)  |
| O(3)-Nd(1)-O(4)     | 134.68(9)  | O(4)#3-Nd(1)-C(1)   | 136.05(10) |
| O(3)#3-Nd(1)-O(4)   | 131.72(9)  | O(1)#3-Nd(1)-C(1)   | 142.60(11) |
| O(2)#1-Nd(1)-O(4)#3 | 76.90(10)  | O(1)-Nd(1)-C(1)     | 22.81(10)  |
| O(2)#2-Nd(1)-O(4)#3 | 75.27(10)  | O(2)#3-Nd(1)-C(1)   | 152.74(9)  |
| O(3)-Nd(1)-O(4)#3   | 131.72(9)  | O(2)-Nd(1)-C(1)     | 23.81(9)   |
| O(3)#3-Nd(1)-O(4)#3 | 134.69(9)  | O(3)-Nd(1)-O(1)     | 69.76(10)  |
| O(4)-Nd(1)-O(4)#3   | 71.43(14)  | O(3)#3-Nd(1)-O(1)   | 78.04(10)  |
| O(2)#1-Nd(1)-O(1)#3 | 107.19(10) | O(4)-Nd(1)-O(1)     | 74.08(10)  |
| O(2)#2-Nd(1)-O(1)#3 | 84.19(10)  | O(4)#3-Nd(1)-O(1)   | 143.82(10) |
| O(3)-Nd(1)-O(1)#3   | 78.04(10)  | O(2)#1-Nd(1)-O(1)   | 84.19(10)  |
| O(3)#3-Nd(1)-O(1)#3 | 69.76(10)  | O(2)#2-Nd(1)-O(1)   | 107.19(10) |
| O(4)-Nd(1)-O(1)#3   | 143.83(10) | O(1)#3-Nd(1)-O(1)   | 141.68(14) |
| O(4)#3-Nd(1)-O(1)#3 | 74.08(10)  |                     |            |

Symmetry transformations used to generate equivalent atoms:

#1  $x-1/4, y-1/4, -z+1$     #2  $-x+1/2, -y+1/2, -z+1$     #3  $-x+1/4, -y+1/4, z$
